# Supplementary material for: Aromatic ring compounds with different conjugation degrees in a boronic acid matrix to realize multicolor phosphorescence for time division colorful multiplexing
Source: Royal Society of Chemistry journal article supplement (doi:10.1039/d4nr05190d), 2025-01-01
Supplement: d4nr05190d1.pdf [file d4nr05190d1.pdf]

**Aromatic ring compounds with different conjugation degrees in boronic acid matrix to realize multicolor phosphorescence for time division colorful multiplexing**

Qing Yao<sup>1</sup>, Zeyu Wang\*<sup>2</sup>, Nikolai V. Gaponenko<sup>3</sup>, Jindou Shi<sup>1</sup>, Chen Zhang<sup>1</sup>, Junnan Wang<sup>1</sup>, Zheyuan Da<sup>1</sup>, Wangchao Wan<sup>1</sup> and Minqiang Wang<sup>1</sup>

<sup>1</sup>Electronic Materials Research Laboratory, Key Laboratory of the Ministry of Education International Center for Dielectric Research&Shaanxi Engineering Research Center of Advanced Energy Materials and Devices, Xi'an Jiaotong University, 710049 Xi'an, China.

<sup>2</sup>Frontier Institute of Science and Technology (FIST), and Micro- and Nano-technology Research Center of State Key Laboratory for Manufacturing Systems Engineering, Xi'an Jiaotong University, 710049, Xi'an China

<sup>3</sup>Belarusian State University of Informatics and Radioelectronics, P. Browki 6, 220013 Minsk, Belarus.

Corresponding Author: E-mail: [zeyu.wang@xjtu.edu.cn](mailto:zeyu.wang@xjtu.edu.cn)

**Experimental section**

**Materials**

2-Phenethylamine (2-Ph), 9-Aminophenanthrene (9-Ph), 1-Aminopyrene (1-Py), were obtained from Macklin Co. Ltd. Boric acid (BA) were purchased from Aladdin Chemical Co., Ltd.

Deionized water was got from a milipore purification system.

**Synthesis**

2-Ph@BA was synthesized based on the following method. 10 mg 2-Ph and 1 g BA were added to a beaker, then 10 ml of ultrapure water was added and stirred for 30 min to fully disperse. The beaker was covered with tin foil to avoid rapid evaporation of water, and then heated at 200°C for

3 h. Moreover, different ratios (5 mg, 10 mg, 15 mg, 20 mg) of precursor molecules, different , reaction temperature (180°C, 200°C, 220°C, 240°C) and heating time (2 h, 2.5 h, 3 h, 3.5 h) of 2-Ph@BA were investigated. 2-Ph@BA, 9-Ph@BA and 1-Py@BA were prepared in a similar way to the above steps.

### **Characterization**

The microstructure of samples was performed on a high-resolution transmission electron microscope (TEM, JEOL JEM-F200). The morphology and EDS spectra of samples were investigated by field emission scanning electron microscopy (SEM, FEI Quatan FEG 250) equipped with an energy dispersive spectrometer (EDS). The X-ray diffraction (XRD) patterns were obtained using the DB-ADVANCE X-ray diffraction analyzer diffractometer. Fourier transform infrared spectroscopy (FT-IR) from Thermofisher Nicolet iS10 and X-ray photoelectron spectroscopy (XPS) from Thermo Fisher ESCALAB Xi were employed to analyze the surface functional groups and the elements of the synthesized materials. The TG curves was tested by synchronous thermal analyzer using NETZSCH STA449F5. The raman spectra were obtained using a HORIBA Jobin Yvon LabRAM HR Evolution system. The photoluminescence (PL) spectra and time-resolved PL spectra were recorded on an Edinburgh Instruments FLS 1000 spectrometer. The ultraviolet-visible (UV-Vis) absorbance spectra were recorded by PE Lambda 950.

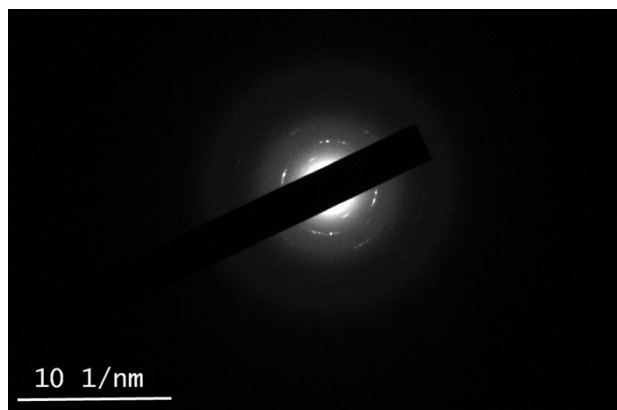

Figure S1. The SAED image of RTP CDs.

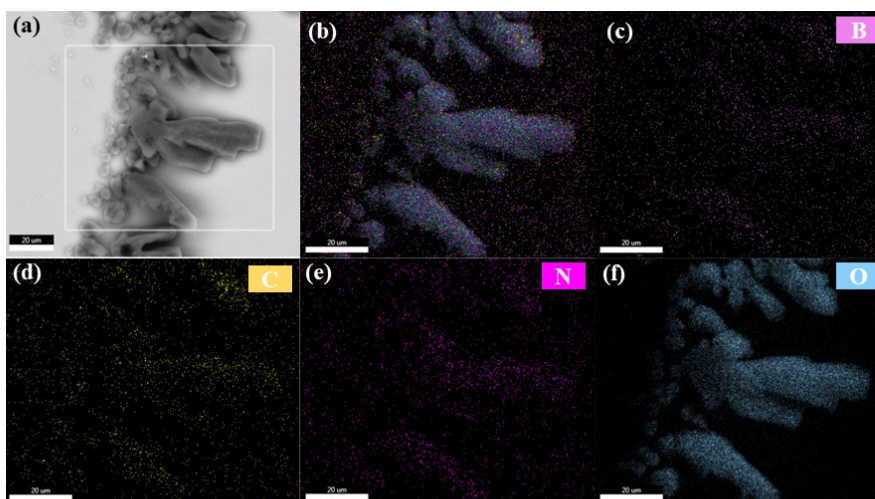

Figure S2. a) SEM image of RTP CDs. b-f) The elemental mapping (B, C, N and O) of EDS spectrum.

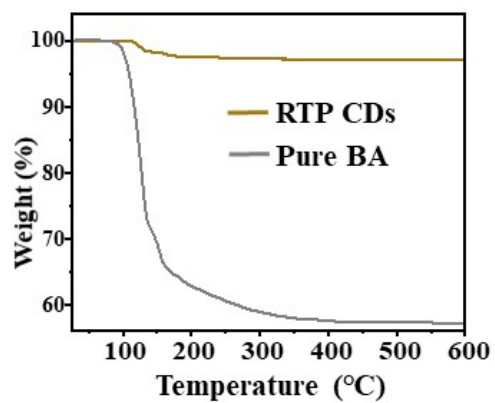

Figure S3. TG curves of RTP CDs and pure BA from 25 to 600°C.

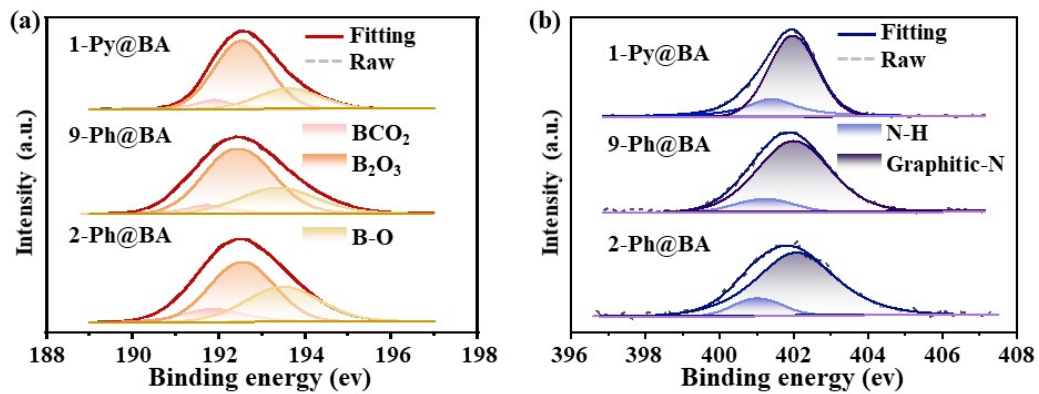

Figure S4. a,b) The high-resolution XPS spectra of B 1s and N 1s of 2-Ph@BA, 9-Ph@BA and 1-Py@BA.

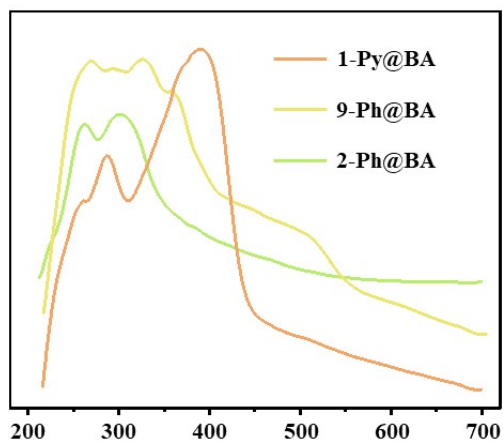

Figure S5. UV-vis adsorption spectra of 2-Ph@BA, 9-Ph@BA and 1-Py@BA.

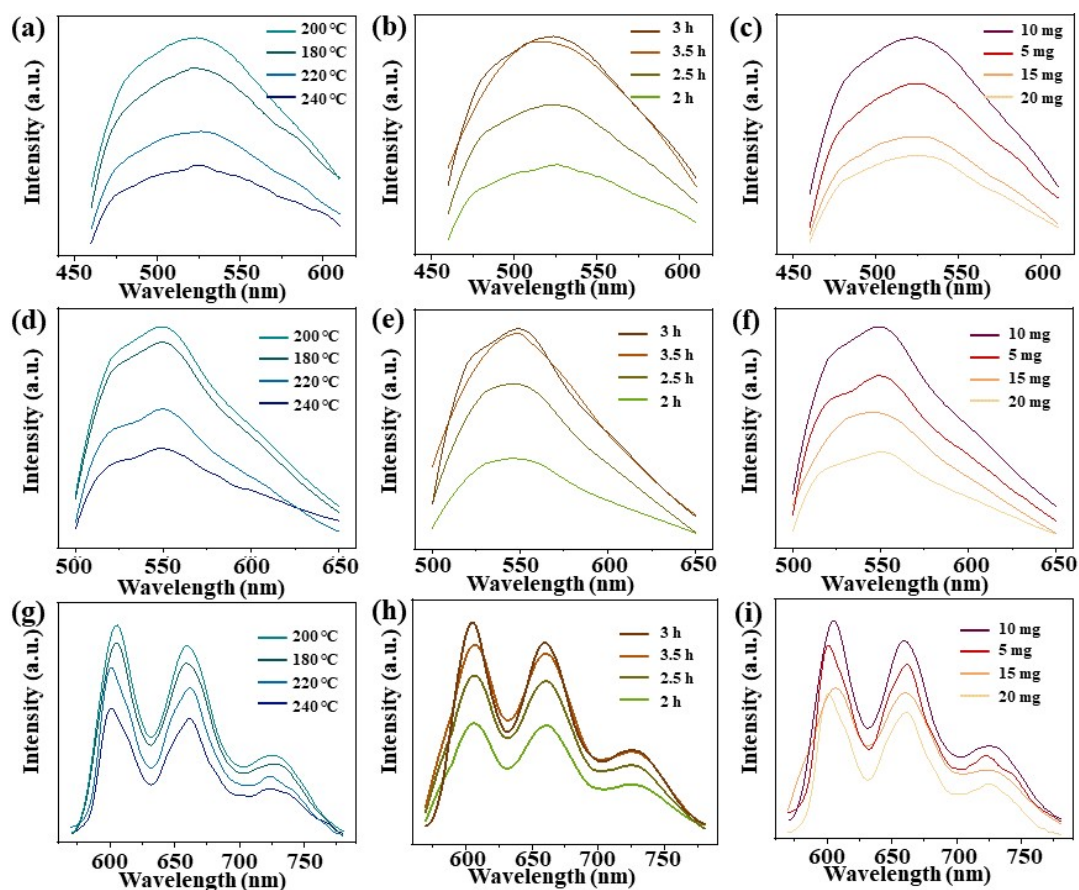

Figure S6. The different synthesis temperatures, heating times and raw material ratios of 2-Ph@BA (a, b, c), 9-Ph@BA (d, e, f) and 1-Py@BA (g, h, i).

Table S1. The fitting constants of 2-Ph@BA, 9-Ph@BA and 1-Py@BA

| Sample  | $\tau_1$ (ms) | $\tau_2$ (ms) | $B_1$ | $B_2$ | $\tau_{avg}$ (ms) |
|---------|---------------|---------------|-------|-------|-------------------|
| 2-Ph@BA | 909           | 113           | 2183  | 419   | 890.4             |
| 9-Ph@BA | 1327          | 84            | 1625  | 783   | 1290              |
| 1-Py@BA | 348           | 74            | 1468  | 116   | 343               |

Table S2. The synthesis conditions, RTP properties and application of multicolor RTP CDs.

| Matrix                        | Reaction parameter                                      | Afterglow lifetime          | Afterglow color                                   | QY                         | Application                                                   | Ref          |
|-------------------------------|---------------------------------------------------------|-----------------------------|---------------------------------------------------|----------------------------|---------------------------------------------------------------|--------------|
| Urea                          | Hydrothermal, 150 °C, 5 h /Solvothermal, 160 °C, 6 h    | 445 ms<br>281 ms            | Yellow-green (565 nm)<br>Orange (605 nm)          | -                          | Anticounterfeiting and information encryption                 | <sup>1</sup> |
| NaOH                          | Microwave, 750 W, 2.5 min                               | 398 ms<br>347 ms<br>58 ms   | Blue (483 nm)<br>Green (517 nm)<br>Red (635 nm)   | 9.05 %<br>4.4 %<br>0.63 %  | Information encryption                                        | <sup>2</sup> |
| SiO <sub>2</sub>              | Hydrothermal, 180 °C, 10 h / Hot-urea-bath, 150 °C, 2 h | 2030 ms<br>480 ms<br>400 ms | Blue (445 nm)<br>Green (550 nm)<br>Red (615 nm)   | 50.17%                     | Fingerprint detection<br>Temperature sensing                  | <sup>3</sup> |
| B <sub>2</sub> O <sub>3</sub> | Solvothermal, 200 °C, 5 h /Heat, 180 °C, 5 h            | 423.5 ms<br>455.9 ms        | Blue (475 nm)<br>Yellow-green (555 nm)            | 17.6%                      | Temperature sensing/Latent fingerprint identification         | <sup>4</sup> |
| B <sub>2</sub> O <sub>3</sub> | Solvothermal, 200 °C, 3 h                               | 1290 ms<br>890 ms<br>340 ms | Green (495 nm)<br>Yellow (560 nm)<br>Red (605 nm) | 24.59%,<br>32.57%<br>8.62% | Information encryption<br>Time division colorful multiplexing | This work    |

## References

1. C. Li, H. Liang, S. Bai, J. Zhu, Z. Chen, G. Yang and Y. Zhu, *Journal of Luminescence*, 2023, **25**, 119497.
2. Z.-Z. Ding, C.-L. Shen, J.-F. Han, G.-S. Zheng, Q.-C. Ni, R.-W. Song, K.-K. Liu, J.-H. Zang, L. Dong, Q. Lou and C.-X. Shan, *Small*, 2023, **19**, 2205916.

3. Z. Song, Y. Shang, Q. Lou, J. Zhu, J. Hu, W. Xu, C. Li, X. Chen, K. Liu, C.-X. Shan and X. Bai, *Adv. Mater.* 2022, **35**, 2207970.
4. W. He, X. Sun and X. Cao, *ACS Sustainable Chem. Eng.* 2021, **9**, 4477.
